# Supplementary material
Source: PubMed Central journal article supplement (PMC6205721)
Supplement: NIHMS936527-supplement-2.pdf [file NIHMS936527-supplement-2.pdf]

Fig S1

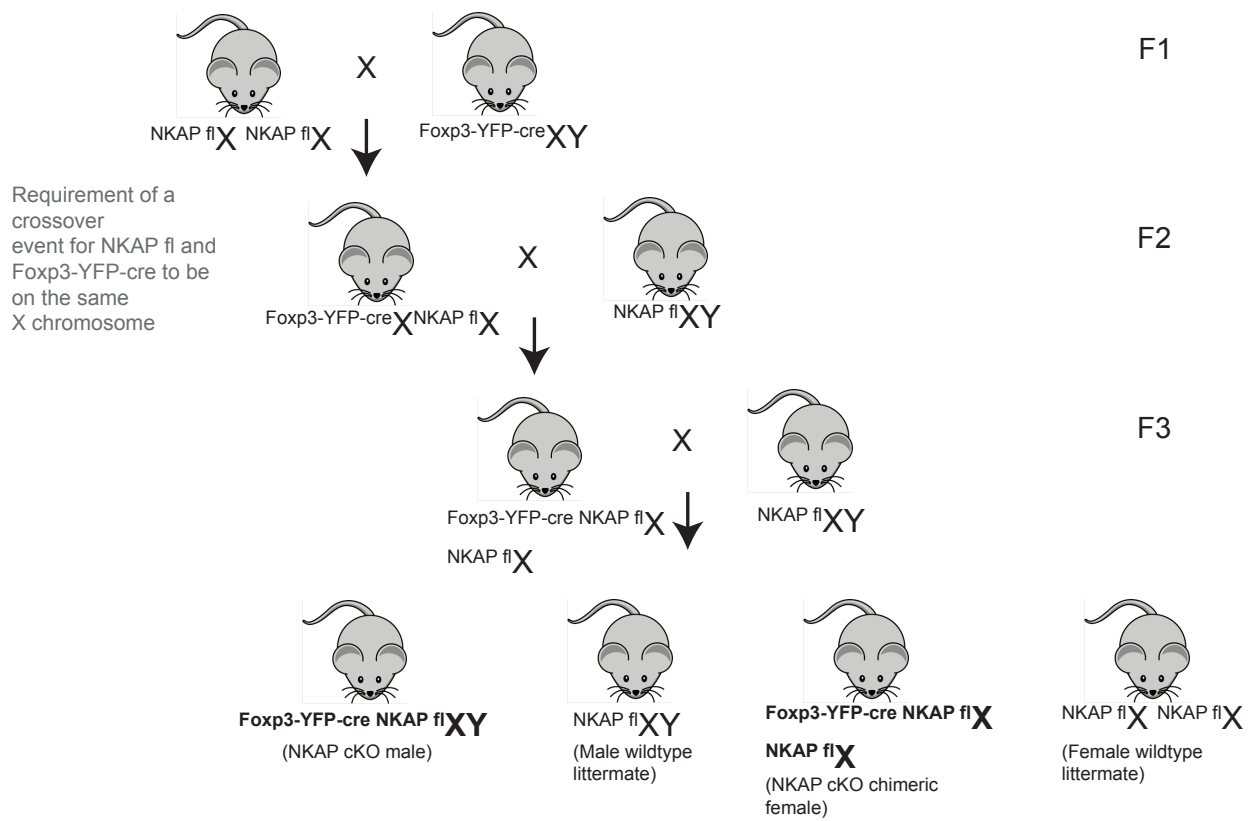

Fig S1. Breeding scheme for for deletion of NKAP in Tregs. Both NKAP and Fxp3 are X-chromosome encoded proteins. As females undergo random X-chromosome inactivation and males are hemizygous, there was a requirement for a crossover event between  $Fxp3\text{-YFP-cre}^XNKAP\ fl^X$  at F3 to allow for the same X-chromosome to carry the Fxp3-YFP-cre allele and the NKAP floxed (fl) allele for these studies.
