# Supplementary material
Source: PubMed Central journal article supplement (PMC6205721)
Supplement: NIHMS936527-supplement-3.pdf [file NIHMS936527-supplement-3.pdf]

Fig S2

A) Gated on Foxp3-YFP-cre<sup>+</sup> CD4<sup>+</sup> Splenocytes

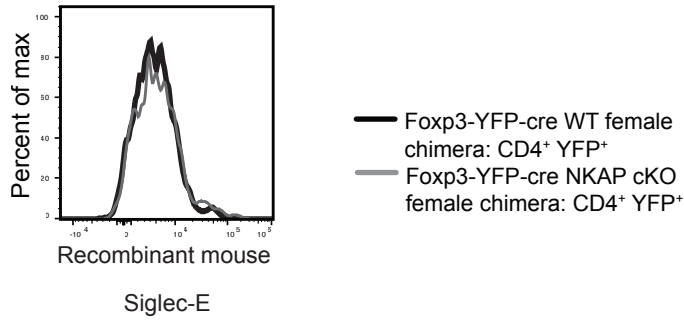

B) Gated on Foxp3-YFP-cre<sup>+</sup> CD4<sup>+</sup> CD25<sup>+</sup> Splenocytes

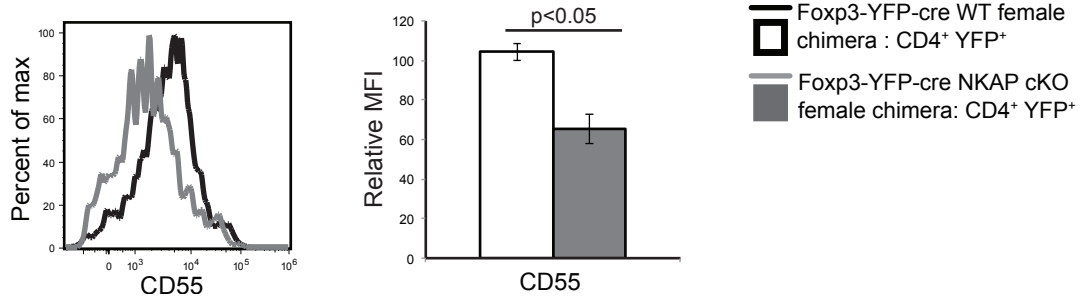

Fig S2: A)  $\alpha$ 2,8 sialylation was assessed using recombinant mouse Siglec-E binding in CD4<sup>+</sup>YFP<sup>+</sup> splenocytes in Foxp3-YFP-cre WT chimeric females and Foxp3-YFP-cre NKAP cKO females. Data representative of 3 experiments with at least 3 mice in each group. B) CD55 expression was assessed in CD4<sup>+</sup> CD25<sup>+</sup> YFP<sup>+</sup> splenocytes in Foxp3-YFP-cre WT chimeric females and Foxp3-YFP-cre NKAP cKO females. Bar graphs are average Relative MFI and error bars are standard error of mean. Data is representative of 2 experiments with at least 3 mice in each group.
